# Supplementary material
Source: publisher site journal article supplement (https://www.dovepress.com/article/422197)
Supplement: Supplementary file 1 [file get_supplementary_file.php]

**Supplementary 1: English Version of Pain Assessment and the CPCS**

**Pain Assessment**

1. What is the duration of your current pain: ____year ____month
2. What is the intensity of the following symptoms in the past week？

- **Pain**

| None | 0 | 1 | 2 | 3 | 4 | 5 | 6 | 7 | 8 | 9 | 10 | Extreme/ Worst Possible |
| --- | --- | --- | --- | --- | --- | --- | --- | --- | --- | --- | --- | --- |

- **Ma**

| None | 0 | 1 | 2 | 3 | 4 | 5 | 6 | 7 | 8 | 9 | 10 | Extreme/ Worst Possible |
| --- | --- | --- | --- | --- | --- | --- | --- | --- | --- | --- | --- | --- |

- **Sng**

| None | 0 | 1 | 2 | 3 | 4 | 5 | 6 | 7 | 8 | 9 | 10 | Extreme/ Worst Possible |
| --- | --- | --- | --- | --- | --- | --- | --- | --- | --- | --- | --- | --- |

**The Chronic Pain Cognition Scale**

| Please circle a number that best reflects how much do you agree with the following statements: | | | | | |
| --- | --- | --- | --- | --- | --- |
|  | Totally Disagree | Disagree | Half-and-Half | Agree | Totally Agree |
| 01. Pain turned my life upside down | 1 | 2 | 3 | 4 | 5 |
| 02. I will avoid doing anything that could cause me pain | 1 | 2 | 3 | 4 | 5 |
| 03. Forbearing the pain is better than losing face | 1 | 2 | 3 | 4 | 5 |
| 04. The effect of treatments often does not meet my expectation | 1 | 2 | 3 | 4 | 5 |
| 05. Families/friends should consider my pain and should not let me do things that would cause the pain easily | 1 | 2 | 3 | 4 | 5 |
| 06. I feel like losing face because of having to take long-term medication because of the pain | 1 | 2 | 3 | 4 | 5 |
| 07. Pain makes me feel depressed and sad | 1 | 2 | 3 | 4 | 5 |
| 08. Medication affects my pain poorly | 1 | 2 | 3 | 4 | 5 |
| 09. Pain has a significant impact on my living | 1 | 2 | 3 | 4 | 5 |
| 10. I feel desperate about the pain | 1 | 2 | 3 | 4 | 5 |
| 11. The reasons causing my pain are mainly related to myself (e.g., movements and living habits) | 1 | 2 | 3 | 4 | 5 |
| 12. I do not know what to do to reduce my pain | 1 | 2 | 3 | 4 | 5 |
| 13. I lose face when letting others know that I cannot act normally because the pain (e.g., I have to use walkers or bend over to walk) | 1 | 2 | 3 | 4 | 5 |

**Supplementary 2: Traditional Chinese Version of Pain Assessment and the CPCS**

**疼痛狀況**

1. 您這次的疼痛問題已持續多久時間了：共____年____月（____週）
2. 請問您過去一週中，下列各項症狀平均來說**有多嚴重**？

請您依直覺圈選一個最符合您情況的數字：

- **疼痛**

| 完全沒有 | 0 | 1 | 2 | 3 | 4 | 5 | 6 | 7 | 8 | 9 | 10 | 非常嚴重 |
| --- | --- | --- | --- | --- | --- | --- | --- | --- | --- | --- | --- | --- |

- **麻**

| 完全沒有 | 0 | 1 | 2 | 3 | 4 | 5 | 6 | 7 | 8 | 9 | 10 | 非常嚴重 |
| --- | --- | --- | --- | --- | --- | --- | --- | --- | --- | --- | --- | --- |

- **痠**

| 完全沒有 | 0 | 1 | 2 | 3 | 4 | 5 | 6 | 7 | 8 | 9 | 10 | 非常嚴重 |
| --- | --- | --- | --- | --- | --- | --- | --- | --- | --- | --- | --- | --- |

**慢性疼痛認知評估量表**

| 下列項目是其他病人告訴我們有關疼痛的描述，請問以您的情形來說，您覺得這些說法**有多正確**，或你**有多認同**這些說法，請依直覺圈選一個最符合的數字： | | | | | |
| --- | --- | --- | --- | --- | --- |
|  | 相當不正確 | 不正確 | 一半一半 | 正確 | 相當正確 |
| 1. 疼痛讓我的人生變了調 | 1 | 2 | 3 | 4 | 5 |
| 1. 我會避免做任何可能讓我疼痛的事情 | 1 | 2 | 3 | 4 | 5 |
| 1. 忍痛總比丟臉好 | 1 | 2 | 3 | 4 | 5 |
| 1. 治療效果常不符合我的期望 | 1 | 2 | 3 | 4 | 5 |
| 1. 家人（朋友）應該要考慮到我的疼痛狀況，不要讓我做容易痛的事 | 1 | 2 | 3 | 4 | 5 |
| 1. 我覺得因為疼痛而需要長期吃藥是件丟臉的事 | 1 | 2 | 3 | 4 | 5 |
| 1. 疼痛讓我感到沮喪、難過 | 1 | 2 | 3 | 4 | 5 |
| 1. 藥物對我的疼痛來說效果不佳 | 1 | 2 | 3 | 4 | 5 |
| 1. 疼痛對我的生活造成很大的影響 | 1 | 2 | 3 | 4 | 5 |
| 1. 我對這個疼痛感到絕望 | 1 | 2 | 3 | 4 | 5 |
| 1. 疼痛發生的原因主要和自己有關（如動作、生活習慣等） | 1 | 2 | 3 | 4 | 5 |
| 1. 我不知道要怎麼做才能讓自己比較不痛 | 1 | 2 | 3 | 4 | 5 |
| 1. 讓別人看到我因為疼痛而無法正常活動是沒面子的   （如需要用拐杖、彎腰走路等） | 1 | 2 | 3 | 4 | 5 |
